# Supplementary material for: New use of an old drug: inhibition of breast cancer stem cells by benztropine mesylate
Source: PubMed Central journal article supplement (PMC5352030; doi:10.18632/oncotarget.13537), 2016-11-24
Supplement: oncotarget-08-1007-s001.pdf [file oncotarget-08-1007-s001.pdf]

## New use of an old drug: inhibition of breast cancer stem cells by benzotropine mesylate

### SUPPLEMENTARY METHODS

#### Ligand-based target prediction using SPiDER 1.0

For ligand-based target prediction of benzotropine mesylate, we used the self-organizing map-based prediction of drug equivalence relationships (SPiDER version 1.0; modlab-cadd.ethz.ch/software/spider/) ((1) Briefly, benzotropine mesylate was preprocessed with the Molecular Operating Environment (MOE; Chemical Computing Group, Montreal, Canada; Version 2011.10) “wash” function (protonate bases, deprotonate acids, add hydrogens). Subsequently, the molecule was described in terms of its pharmacophoric correlation vector (CATS2) (2) and physicochemical properties (MOE2D). Using these descriptor vectors, the molecule was co-clustered

with known drug-like compounds (COBRA database, v12.6, inSili.com) (3) and targets inferred statistically according to the distance to known ligands in chemical space, rationalized by a background distribution of inter-target drug-drug similarities. The two acquired prediction scores (CATS2 and MOE2D) were averaged to yield a consensus score. This consensus score was again evaluated statistically by converting it into a conservative  $p$  value according to a background database of prediction scores achieved by random drug-like molecules. These reported  $p$  values indicate the confidence in a prediction by putting them into perspective according to target scores that are acquired through random chemical similarity. Full technical details can be found in the original publication (1).

### REFERENCES

1. Reker D, Rodrigues T, Schneider P, Schneider G. Identifying the macromolecular targets of de novo-designed chemical entities through self-organizing map consensus. *Proc Natl Acad Sci USA*. 2014;111:4067-72.
2. Reutlinger M, Koch CP, Reker D, Todoroff N, Schneider P, Rodrigues T, et al. Chemically Advanced Template Search (CATS) for Scaffold-Hopping and Prospective Target Prediction for ‘Orphan’ Molecules. *Mol Inform*. 2013;32:133-8.
3. Schneider P, Schneider G. Collection of Bioactive Reference Compounds for Focused Library Design. *QSAR Comb. Sci*. 2003; 22:713-8.

## SUPPLEMENTARY FIGURES AND TABLES

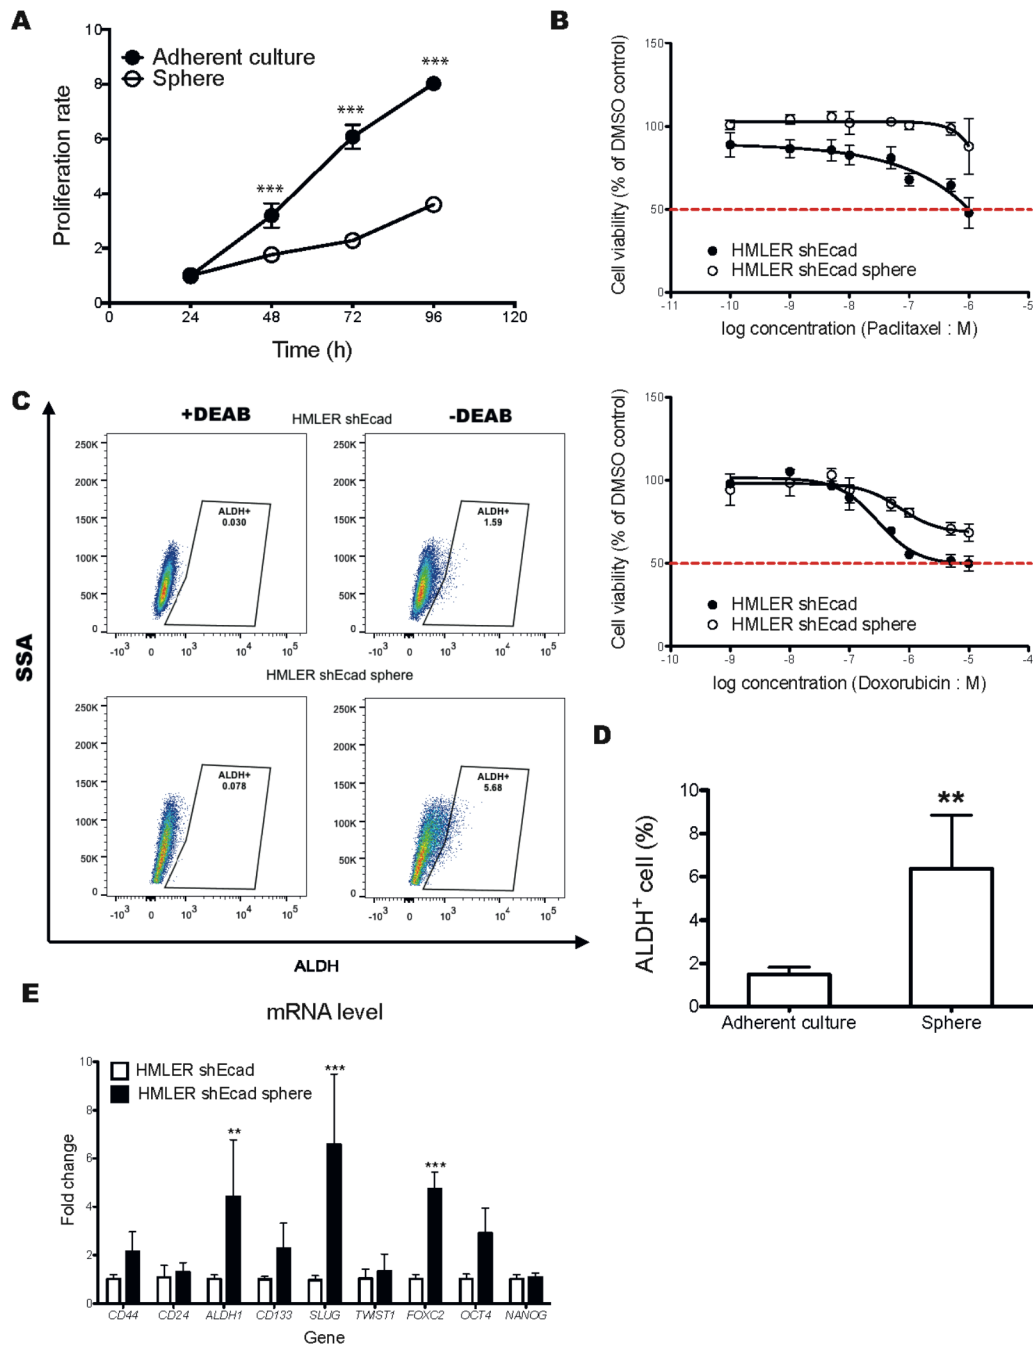

**Supplementary Figure S1: Enrichment of BCSCs by mammosphere culture of EMT-induced breast cancer cells (HMLER-shEcad).** **A.** Proliferation curves of 1,000 cells isolated from HMLER-shEcad adherent cells and spheres grown for 96 h. Cell viability was measured by the CCK-8 assay. Data are expressed as mean±SD ( $n=6$ ). \*\*\* $p<0.001$  (two-way ANOVA). **B.** Dose-response curves of HMLER-shEcad adherent cells and spheres treated with doxorubicin or paclitaxel. **C.** ALDH enzymatic activity in sphere-forming cells compared to adherent cells measured using the ALDEFLUOR kit. **D.** Summary data showing the percentage of ALDH<sup>+</sup> cells in the HMLER-shEcad cells and mammospheres. **E.** qRT-PCR analysis of CSC-related genes in HMLER-shEcad adherent cells and spheres. Data are normalized to *ACTB* expression and are presented as fold change in gene expression relative to adherent cells. Data are expressed as mean±SD ( $n=3$ ). \*\* $p<0.01$ , \*\*\* $p<0.001$  (Student's *t*-test).

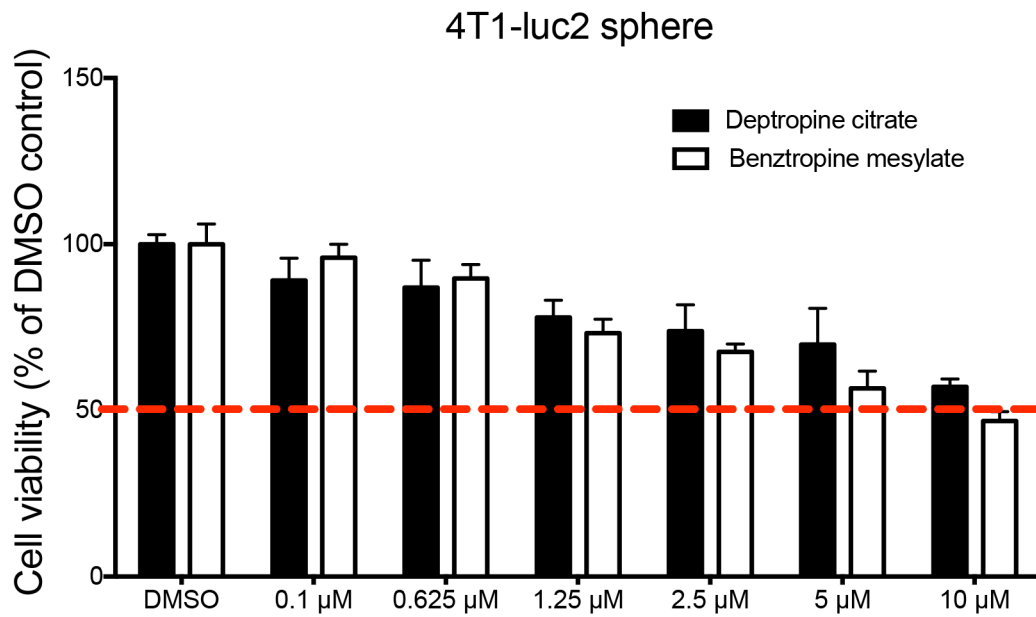

**Supplementary Figure S2: Cell viability assay.** Cell viability of 4T1-luc2 spheres treated with different concentrations of depropine citrate and benztropine mesylate for 72 h are shown. Data are expressed as mean±SD.

**A MDA-MB-231 cells**

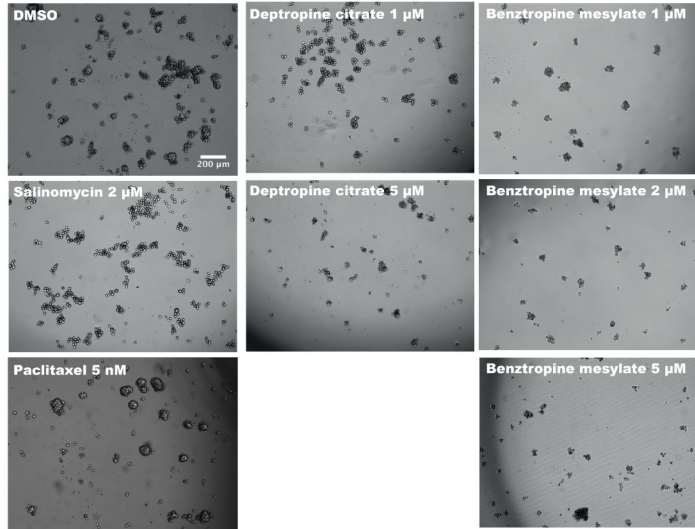

**B 4T1-luc2 cells**

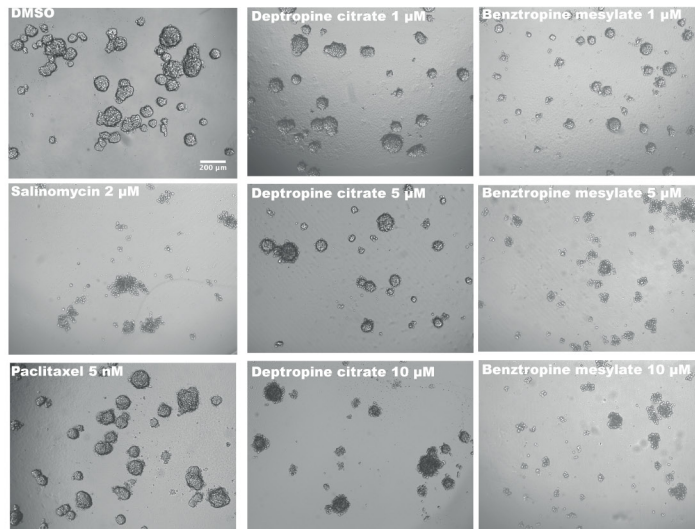

**C**

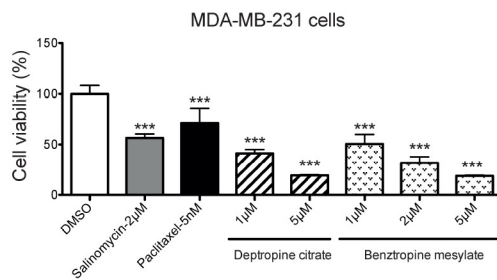

**D**

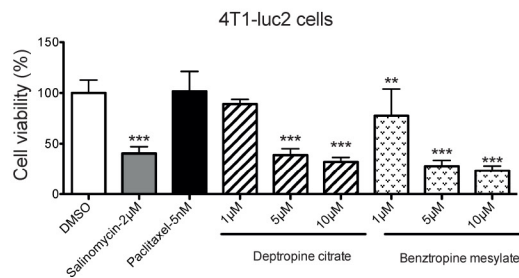

**Supplementary Figure S3: Mammosphere formation assay.** Morphology A-B. and cell viability C-D. of mammospheres from MDA-MB-231 cells and 4T1-luc2 cells which were treated with different concentrations of deptropine citrate, benztropine mesylate, salinomycin and paclitaxel for 6 days. Scale bars indicate 200 μm. Data are expressed as mean±SD (n=6). \*\**p*<0.01, \*\*\**p*<0.001 compared with DMSO control (one-way ANOVA).

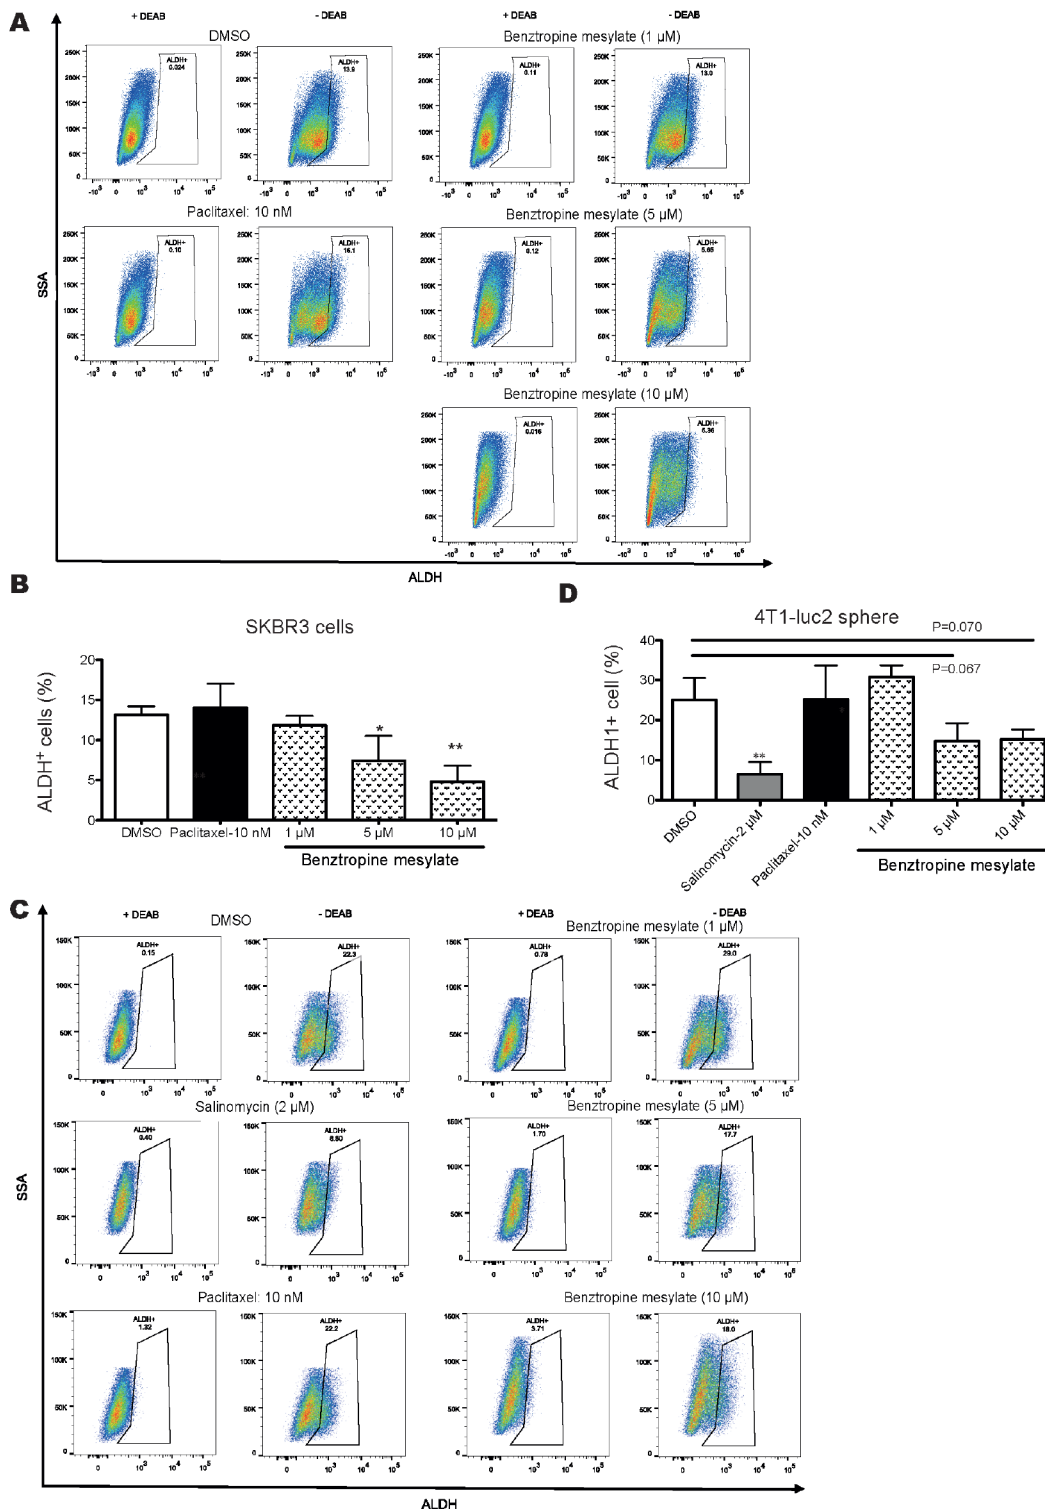

**Supplementary Figure S4: FACS analysis of ALDH<sup>+</sup> cell population in SKBR3 and 4T1-luc2 cells with or without benzotropine mesylate treatment.** SKBR3 and 4T1-luc2 cells were treated with benzotropine mesylate (1, 5 or 10 μM), paclitaxel (10 nM) or DMSO for 4 days. Single cell suspensions were used for FACS analysis. Representative data for the ALDH<sup>+</sup> population in benzotropine mesylate-treated SKBR3 cells **A**, and 4T1-luc2 cells **C**, show a reduction compared with DMSO-treated cells. DEAB was used to inhibit the reaction of ALDH with the ALDEFLUOR reagent, providing a negative control. Data of the proportion of ALDH<sup>+</sup> cells are shown as mean±SD **B**, **D**. Experiments (n=3) were conducted in triplicates. \*p < 0.05, \*\*p < 0.01 compared with DMSO control (one-way ANOVA).

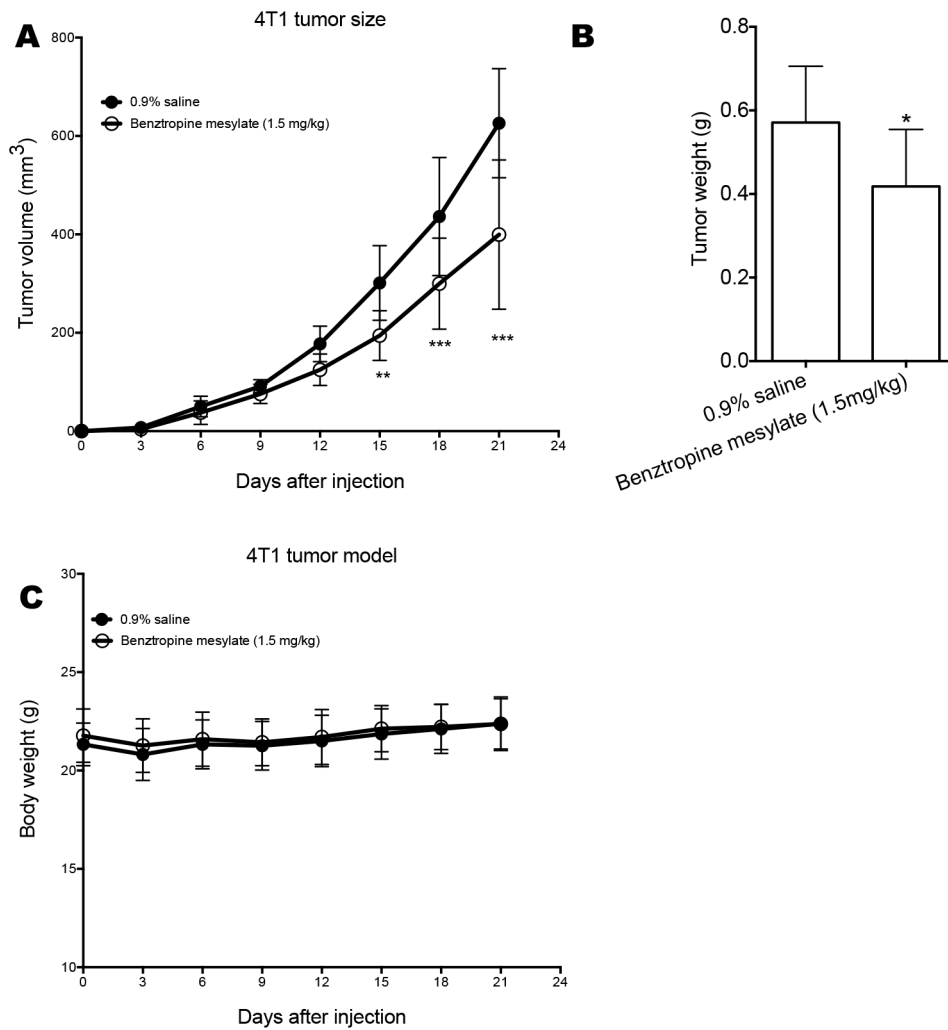

**Supplementary Figure S5: Effects of benztropine mesylate treatment on tumor growth *in vivo*.** Balb/c mice were injected with 4T1 breast tumors and were treated with benztropine mesylate (1.5 mg/kg; n=10) or 0.9% saline (n=10) for 3 weeks. Tumor volume **A.**, tumor weight **B.**, and body weight **C.** change after treatment. Data are expressed as mean  $\pm$  SD (n = 10). \*\*\* $p$ <0.001, \*\* $p$ <0.01, \* $p$ <0.05.

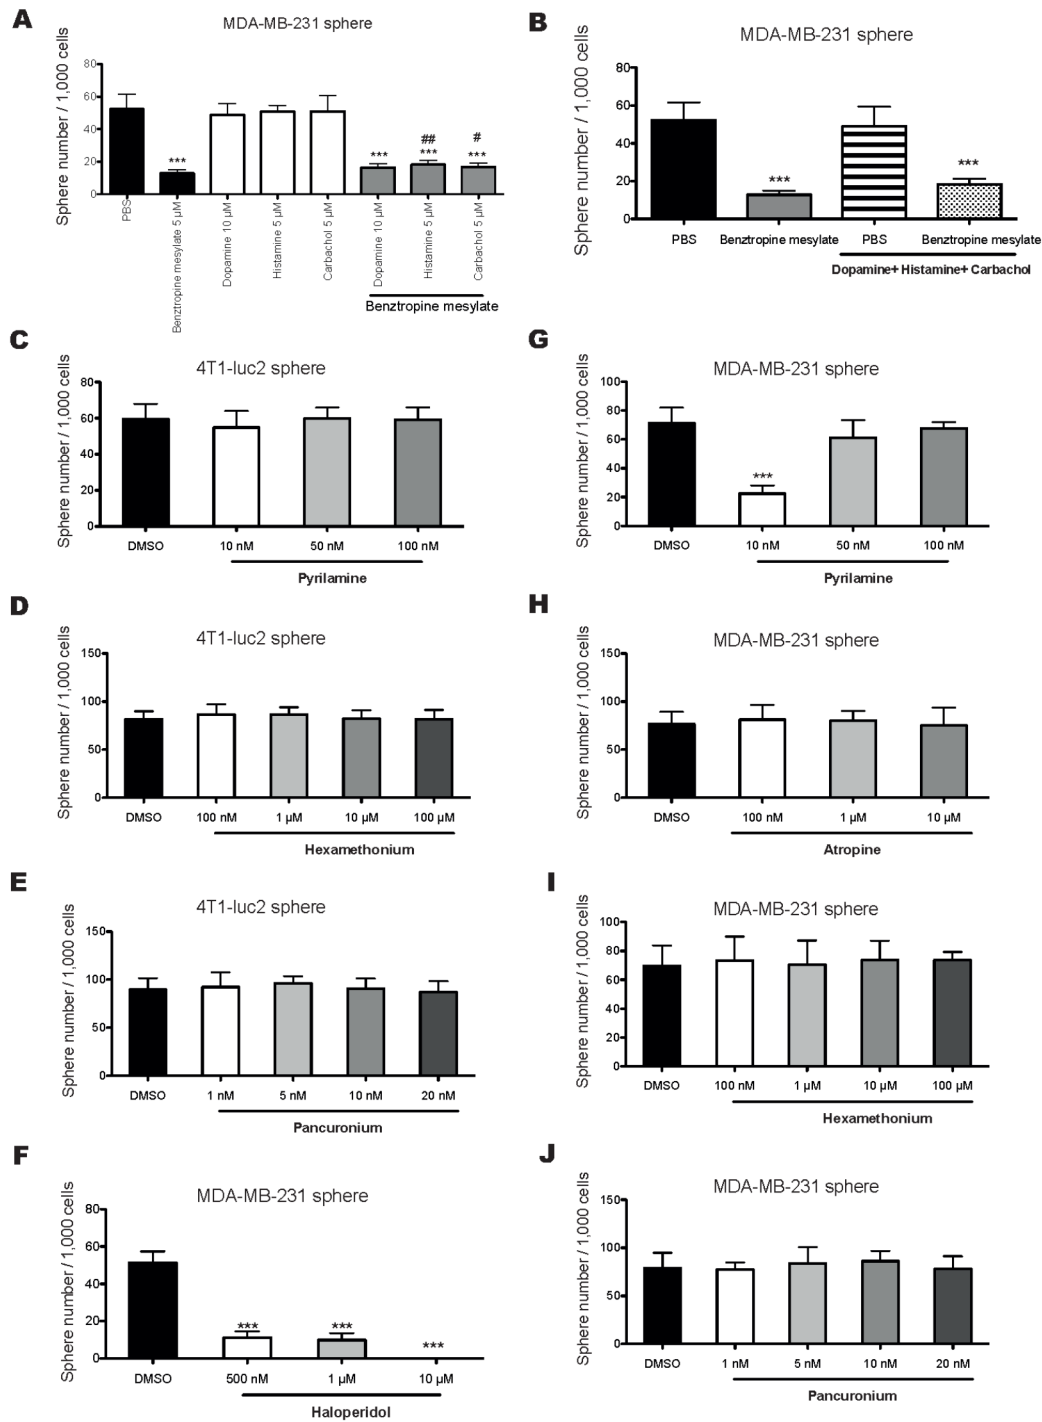

**Supplementary Figure S6: Benztropine mesylate partially impairs mammosphere formation of BCSCs through acetylcholine receptors, dopamine receptors/transporters and/or histamine receptors.** Qualification of mammosphere formation efficiency of 1,000 MDA-MB-231 cells co-treated with benztropine mesylate (5  $\mu$ M) and dopamine (10  $\mu$ M), histamine (5  $\mu$ M) or carbachol (5  $\mu$ M) alone or with an agonist combination (dopamine + histamine + carbachol) for 6 days **A-B**. Quantification of mammosphere numbers from 1,000 MDA-MB-231 and 4T1-luc2 cells treated with the histamine receptor antagonist pyrilamine **C, G**, the nicotine receptor antagonist hexamethonium bromide **D, I**, the muscarinic receptor antagonist atropine **H**, the antagonist of both types of receptors pancuronium bromide **E, J**, or the dopamine receptor antagonist haloperidol **F** for 6 days. Data are expressed as mean $\pm$ SD ( $n=6$ ). \*\*\* $p<0.01$ , \*\*\*\* $p<0.001$  compared with DMSO control (One-way ANOVA).

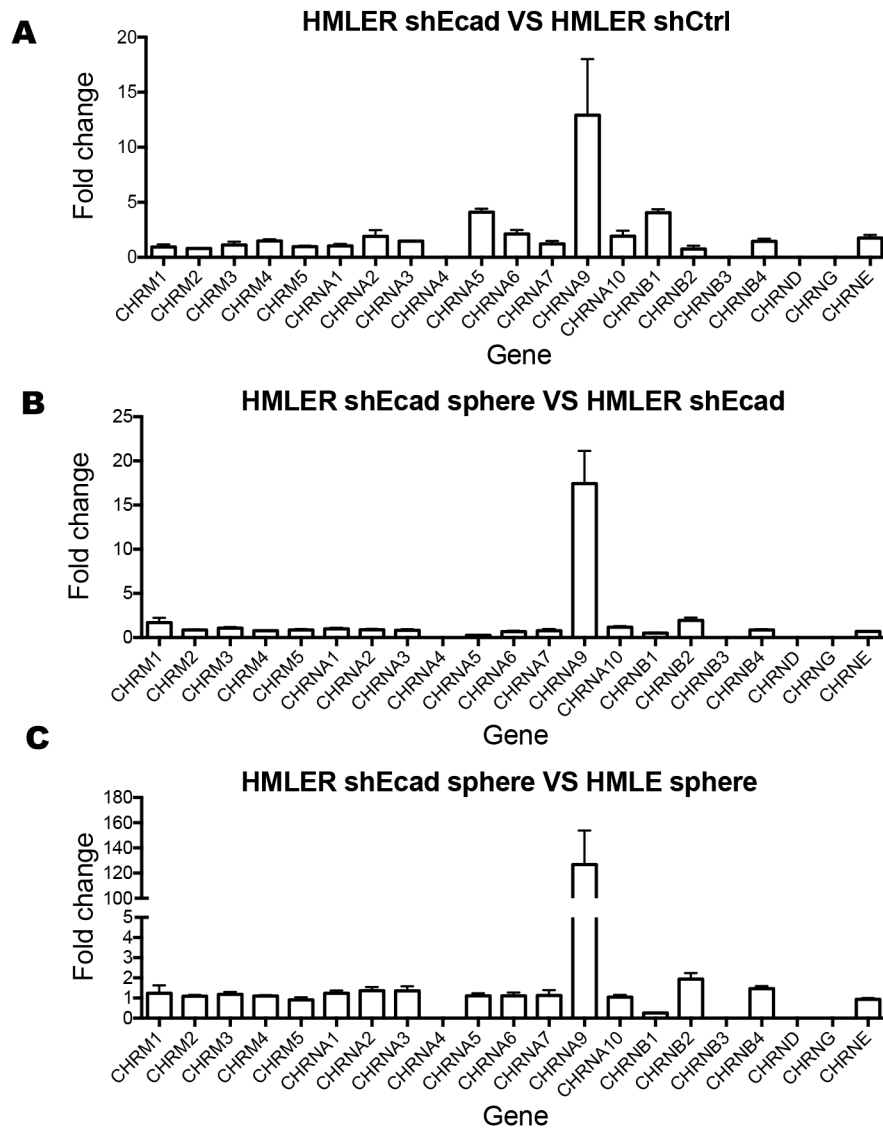

**Supplementary Figure S7: Comparison of acetylcholine receptor mRNA expression levels in HMLE, HMLER shCtrl, and HMLER shEcad adherent cells and spheres.** Data were normalized to ACTB expression. The fold changes in relative gene expression were compared in **A**, HMLER shEcad adherent cells vs HMLER shCtrl adherent cells, **B**, HMLER shEcad spheres vs HMLER shEcad adherent cells, and **C**) HMLER shEcad spheres vs HMLE spheres. Data are expressed as mean  $\pm$  SD (n = 3).



Supplementary Table S1: Primer sequences for qRT-PCR analysis

| Gene           | Forward (5'→3')         | Reverse (5'→3')         |
|----------------|-------------------------|-------------------------|
| <i>ACTB</i>    | CATGTACGTTGCTATCCAGGC   | CTCCTTAATGTCACGCACGAT   |
| <i>CD44</i>    | ACCCAGCAACCCTACTGCTGAT  | TAGCAGGGATTCTGTCTGTG    |
| <i>CD24</i>    | CTCCTACCCACGCAGATTTATTC | AGAGTGAGACCACGAAGAGAC   |
| <i>ALDH1</i>   | CCGTGGCGTACTATGGATGC    | GCAGCAGACGATCTCTTTCGAT  |
| <i>CD133</i>   | AGTCGGAAACTGGCAGATAGC   | GGTAGTGTTGTACTGGGCCAAT  |
| <i>SLUG</i>    | TGTGACAAGGAATATGTGAGCC  | TGAGCCCTCAGATTTGACCTG   |
| <i>TWIST1</i>  | GTCCGCAGTCTTACGAGGAG    | GCTTGAGGGTCTGAATCTTGCT  |
| <i>FOXC2</i>   | CCTCCTGGTATCTCAACCACA   | GAGGGTTCGAGTTCTCAATCCC  |
| <i>OCT4</i>    | CTTGAATCCCGAATGGAAAGGG  | GTGTATATCCAGGGTGATCCTC  |
| <i>NANOG</i>   | TGATTTGTGGGCCTGAAGAAAA  | GAGGCATCTCAGCAGAAGACA   |
| <i>CHRM1</i>   | CTCTATAACCACGTACCTGCTCA | CCGAGTCACGGAGAAGTAGC    |
| <i>CHRM2</i>   | AACTCCTCTAACAATAGCCTGGC | GTTCCCGATAATGGTCACCAAA  |
| <i>CHRM3</i>   | CACAATAACAGTACAACCTCGCC | GCCAGGATGCCCGTTAAGAAA   |
| <i>CHRM4</i>   | GTTTGTGGTGGGTAAGCGGA    | TGCTTCATTAGTGGGCTCTTG   |
| <i>CHRM5</i>   | CAATGCAACCACCGTCAATGG   | ATCTGCACAGGCTAAGCTGAG   |
| <i>CHRNA1</i>  | TCCTGGGCTCCGAACATGA     | ACATTGGTTGTCACGATCTGATT |
| <i>CHRNA2</i>  | AGGCTCGCATAACCGAGACT    | TCACCACGTCTGAAGTGTTGG   |
| <i>CHRNA3</i>  | TGAGCACCGTCTATTTGAGCG   | TGGACACCTCGAAATGGATGAT  |
| <i>CHRNA4</i>  | GGAGGGCGTCCAGTACATTG    | GAAGATGCGGTTCGATGACCA   |
| <i>CHRNA5</i>  | AAAGATGGGTTTCGTCCTGTGG  | CAAACAAAACGATGTCTGGTGTC |
| <i>CHRNA6</i>  | TGAGACTCTTCGCGTTCCTG    | ATTTCAGCTTTGTCATACGTCCA |
| <i>CHRNA7</i>  | GCTGGTCAAGAACTACAATCCC  | CTCATCCACGTCCATGATCTG   |
| <i>CHRNA9</i>  | AAATCTGGCACGATGCCTATC   | GCAGGACCACATTGGTGTTCA   |
| <i>CHRNA10</i> | TCGACATGGATGAACGGAACC   | ATCGTAGGTAGGCATCTGTCC   |
| <i>CHRN1</i>   | CTCTGGACATTAGCGTTCGTGG  | GCTGAACACCATAGTGCAATTCT |
| <i>CHRN2</i>   | GGTGACAGTACAGCTTATGGTG  | AGGCGATAATCTTCCCCTCC    |
| <i>CHRN3</i>   | TGCTGGTTCTCATCGTCCTTG   | GCATCTTCATTTTCGGCGATTGA |
| <i>CHRN4</i>   | AACCCGTTACAATAACCTGATCC | ATTCACGCTGATAAGCTGGGC   |
| <i>CHRNA11</i> | ATGGTCAACCTGGTCTTCTACC  | CAGGAACTTGCCGATAAGGG    |
| <i>CHRNA12</i> | ACGAGACTCGGATGTGGTCAA   | GACACCGTCCACGTTGTTCT    |
| <i>CHRNA13</i> | GTGGATGCCGTGAACCTCGT    | GCACCCAGTCGGACACTTC     |

Supplementary Table S2: Target prediction of benztropine mesylate by SPiDER 1.0 software

| Rank | Target                                                                    | <i>p</i> value |
|------|---------------------------------------------------------------------------|----------------|
| 1    | Nicotinic Acetylcholine Receptor Agonist                                  | 0.005          |
| 2    | Voltage Dependent Calcium Channel Antagonist                              | 0.009          |
| 3    | Voltage-Gated Potassium Channel                                           | 0.009          |
| 4    | Neuropeptide Y 1 (NPY) Antagonist                                         | 0.011          |
| 5    | Sigma Receptor S1 & S2                                                    | 0.012          |
| 6    | Histamine Receptor H1 & H2                                                | 0.016          |
| 7    | Opioid Receptor Delta, Mu & Kappa                                         | 0.016          |
| 8    | Aspartic Endopeptidase (Secretase & Renin)                                | 0.018          |
| 9    | Monoamine Oxidase (MAO)                                                   | 0.018          |
| 10   | Dopamine Transporter, 5-HTT, NAT & Glycine Transporter                    | 0.019          |
| 11   | Proteinase-Activated Receptor (PAR-1)                                     | 0.022          |
| 12   | Leukotriene-A(4) Hydrolase                                                | 0.022          |
| 13   | Muscarinic Acetylcholine Receptor Antagonist (M1, M2, M3)                 | 0.023          |
| 14   | Dopamine Receptor Antagonist (D1, D2, D3, D4)                             | 0.030          |
| 15   | Phosphodiesterase 3 & 5                                                   | 0.030          |
| 16   | Cannabinoid Receptor 1 & 2                                                | 0.032          |
| 17   | Serotonin Receptor 1-7                                                    | 0.033          |
| 18   | Serine Endopeptidase (Factor Xa, Beta-Tryptase, Thrombin)                 | 0.038          |
| 19   | Sodium Channel                                                            | 0.039          |
| 20   | Serine Threonine Kinase (MAPK14, CK1, AKT, ROCK, A, C, Casein I, p38 MAP) | 0.040          |
| 21   | Ghrelin Receptor                                                          | 0.041          |
| 22   | GABA Receptor A & C                                                       | 0.042          |
| 23   | GABA Transporter I Antagonist                                             | 0.043          |
| 24   | Melanin Concentrating Hormone-1 Receptor Antagonist                       | 0.046          |
| 25   | Neurokinin 1 & 2 Receptor Antagonist                                      | 0.047          |
